# Supplementary material
Source: publisher figshare collection journal article supplement (https://frontiersin.figshare.com/ndownloader/files/12981614)
Supplement: Supplementary file [file 12981614]

## 1. IUNA NPNS mapped to GUI. Rmd

Key packages

- `SQLDF` to join data: joins data more effectively using SQL (link to <http://www.iana.org/assignments/media-types/application/sql>)
- `foreign` read the SPSS data

```
library(sqldf)

'foreign' was built under R version 3.4.1

storePath <- "tmp"
```

NPNS data was in two separate files

1. Anthropometric data
2. Food diary

Joined both files as needed the anthropometry data in the analysis

Join is on subject id

```
# Read the two datasets
antropoDf <- read.csv("npns-antropometry-data.csv", header = TRUE)
fooddataDf <- read.csv("npns-derived-v1_copy.csv", header = TRUE)

# Join the two dataset using the id of the subject
foodDataAgeDf <-
sqldf("SELECT f.*, a.* FROM fooddataDf f LEFT JOIN antropoDf a
ON f.SUBJECID = a.ID")
```

Limited to 3 years old

```
# Looking at only 3 and 5 years old - Note there is no 5 years subjects
foodDataForMapping <- sqldf("SELECT * from foodDataAgeDf WHERE AGE = 3")
```

The GUI food questionnaire and the NPNS data in SPSS format

```
# Reading in the GUI codes
guiFoodQuestions <- read.table(file="GUI-qn.txt", sep=".")
colnames(guiFoodQuestions) <- c('code', 'description')
foodDataSPSS <- read.spss(file="npns-food-file-4R.sav")

## re-encoding from CP1252
```

Included the cooking methods description to build the dataset that is used for mapping using the following variables

3. Food code
4. Food description (short and long)
5. Cooking method (code and description)
6. F77 food category

```

# Loaded initially to map against the 77 food categories
iunaFoodCodes <-
cbind.data.frame(code = seq(1, 77),
description = levels(foodDataSPSS$IUNA_NPNS_77FG))

# Loaded initially to use the cooking
cookingMethodsCodes <- read.table(file = "CMETH.txt", sep = "=")

colnames(cookingMethodsCodes) <- c('code', 'description')

# Group diary entries by IUNA Code 77 and cooking method.
foodGroupsCmeth <-
sqldf("SELECT IUNA_NPNS_77FG, CMETH, count(*) ct FROM foodDataForMapping G
ROUP BY 1,2 ")

# Add description to the cooking method
foodGroupsCmethExt <-
sqldf(
"SELECT fc.description FOODNAME, cm.description COOKINGMETHOD , fg.*
FROM foodGroupsCmeth fg
LEFT JOIN cookingMethodsCodes cm ON cm.code = fg.CMETH
LEFT JOIN iunaFoodCodes fc ON fc.code = fg.IUNA_NPNS_77FG"
)

write.csv(
foodGroupsCmethExt,
file = paste(storePath, "iuna-food-groups-cooking-methods.csv", sep = "/"
),
row.names = FALSE
)

# List of all distinct food in the diary
allFoods <-
sqldf(
"SELECT distinct IUNA_NPNS_77FG, CMETH, FCODE, Food_description_first_firs
t
FROM fooddataDf "
)
## IUNA_NPNS_77FG is too coarse we need to use the actual food codes

allFoodsExt <-
sqldf(
"SELECT fc.description FOODNAME, cm.description COOKINGMETHOD , fg.*
FROM allFoods fg
LEFT JOIN cookingMethodsCodes cm ON cm.code = fg.CMETH
LEFT JOIN iunaFoodCodes fc ON fc.code = fg.IUNA_NPNS_77FG"
)

write.csv(

```

```
allFoodsExt,
file = paste(storePath, "iuna-food-allFoods-with-groups.csv", sep = "/")
,
row.names = FALSE
)
```

Mapping done in Google sheet with filters

At this point the mapping was read. If not mapped we set the GUI\_CODE to NULL

```
mappings <- read.csv(file=paste("iuna-gui-mapping-2015-12-21.csv", sep="
/"), header = TRUE)
```

```
# Setting all empty i.e non categorized foods to NA
mappings[mappings$GUI_CODE == "",]$GUI_CODE <- NA
```

Joined the mapping back to the NPNS data using:

7. FOOD CODE
8. COOKING METHOD

```
foodDataGUIMapped <-
  sqldf(
    "SELECT f.*, m.GUI_CODE from foodDataForMapping f
    LEFT JOIN mappings m on m.FCODE = f.FCODE AND m.CMETH = f.CMETH"
  )
```

## 2. Non-covered analysis.Rmd.

Initially, the data was loaded after we mapped and the IUNA NPNS 77 Food Group was used to group the different foods.

The initial aggregation was done at SUBJECT\_ID and SURVDAY survey day meaning that for each subject and each day of the survey we got an aggregated record.

We defined 4 aggregate metrics:

1. `non_gui_ct` number of entries in the diary which do not map to a GUI food code. Note that an entry in the diary is a *consumption*.
2. `non_gui_fwt` the total weight of the entries which do not map to a GUI food code.
3. `day_ct` total number of entries.
4. `day_fwt` total weight of the entries.

Note that all the 4 aggregates are aggregated at subject and survey day level, meaning that there is an entry for each subject and for each day of the survey.

```
foodDataGUIMapped <- read.csv("foodDataGUIMappedV2.csv")
foodDataSPSS <- read.spss(file="npns-food-file-4R.sav")

DOW <- c('SUN', 'MON', 'TUE', 'WED', 'THU', 'FRI', 'SAT')
foodDataGUIMapped$DOW <- factor(sapply(foodDataGUIMapped$DOW, function(x){
  DOW[x]
}), levels = DOW)
# Loaded initially to map against the 77 food categories
iunaFoodCodes<- cbind.data.frame(code=seq(1,77), description=levels(foodDataSPSS$IUNA_NPNS_77FG))

nonGUIConsumptions <- sqldf("SELECT SUBJECTID, DOW,
                             SUM(CASE WHEN GUI_CODE IS NULL THEN 1 ELSE 0 END) non_gui_ct,
                             SUM(CASE WHEN GUI_CODE IS NULL THEN FWT ELSE 0 END) non_gui_fwt,
                             SUM(CASE WHEN GUI_CODE IS NULL THEN sugars ELSE 0 END) uncovered_total_sugar,
                             SUM(CASE WHEN GUI_CODE IS NULL THEN 0 ELSE sugars END) covered_total_sugars,
                             SUM(sugars) total_sugars,
                             COUNT(*) day_ct,
                             SUM(FWT) day_fwt
                             FROM foodDataGUIMapped GROUP BY SUBJECTID, DOW")
```

### Ratio of non-GUI and total consumptions

Checked if the ratio changes over the day of the survey. Assumed independence across the 4 days.

## Overall view

```
library(ggplot2)
nonGUIConsumptions$ratio_ct <- nonGUIConsumptions$non_gui_ct/nonGUIConsumptions$day_ct
nonGUIConsumptions$ratio_fwt <- nonGUIConsumptions$non_gui_fwt/nonGUIConsumptions$day_fwt

par(mfrow=c(1,1))
xval <- nonGUIConsumptions$ratio_ct*100
h<-hist(xval, xlab='% of total count of consumptions per day',
        main="Unmapped consumptions ratio", col='orange')
xfit <- seq(min(xval), max(xval), length.out = 40)
yfit <- dnorm(xfit, mean = mean(xval), sd= sd(xval))
yfit <- yfit * diff(h$mids[1:2]) * length(xval)
lines(xfit, yfit, col='blue', lwd=2)
box()
```

```
xval <- nonGUIConsumptions$ratio_fwt*100
h<-hist(xval, xlab='% of total food weight per day',
        main="Unmapped food weight", col='orange')
xfit <- seq(min(xval), max(xval), length.out = 40)
yfit <- dnorm(xfit, mean = mean(xval), sd= sd(xval))
yfit <- yfit * diff(h$mids[1:2]) * length(xval)
lines(xfit, yfit, col='blue', lwd=2)
box()
```

```
## [1] "====Uncovered Food Items Weight===="
```

```
pasteecs::stat.desc(nonGUIConsumptions[,c("non_gui_ct", "day_ct", "non_gui_fwt", "day_fwt")])
```

| ##              | non_gui_ct   | day_ct       | non_gui_fwt  | day_fwt      |
|-----------------|--------------|--------------|--------------|--------------|
| ## nbr.val      | 504.0000000  | 504.0000000  | 5.040000e+02 | 5.040000e+02 |
| ## nbr.null     | 0.0000000    | 0.0000000    | 0.000000e+00 | 0.000000e+00 |
| ## nbr.na       | 0.0000000    | 0.0000000    | 0.000000e+00 | 0.000000e+00 |
| ## min          | 1.0000000    | 2.0000000    | 7.100000e+01 | 7.600000e+01 |
| ## max          | 21.0000000   | 35.0000000   | 1.307000e+03 | 2.466000e+03 |
| ## range        | 20.0000000   | 33.0000000   | 1.236000e+03 | 2.390000e+03 |
| ## sum          | 4057.0000000 | 9211.0000000 | 2.088480e+05 | 6.225530e+05 |
| ## median       | 8.0000000    | 18.0000000   | 3.900000e+02 | 1.214000e+03 |
| ## mean         | 8.0496032    | 18.2757937   | 4.143810e+02 | 1.235224e+03 |
| ## SE.mean      | 0.1349343    | 0.2223957    | 9.007997e+00 | 1.641964e+01 |
| ## CI.mean.0.95 | 0.2651043    | 0.4369389    | 1.769793e+01 | 3.225953e+01 |
| ## var          | 9.1764611    | 24.9277628   | 4.089658e+04 | 1.358807e+05 |

```
## std.dev          3.0292674      4.9927711 2.022290e+02 3.686201e+02
## coef.var         0.3763251      0.2731904 4.880268e-01 2.984236e-01
```

```
pasteecs::stat.desc(nonGUIConsumptions[, c("ratio_ct", "ratio_fwt")])
```

```
##              ratio_ct  ratio_fwt
## nbr.val         5.040000e+02 5.040000e+02
## nbr.null        0.000000e+00 0.000000e+00
## nbr.na          0.000000e+00 0.000000e+00
## min            1.250000e-01 4.899931e-02
## max            1.000000e+00 1.000000e+00
## range          8.750000e-01 9.510007e-01
## sum            2.238548e+02 1.738821e+02
## median         4.444444e-01 3.323618e-01
## mean           4.441563e-01 3.450041e-01
## SE.mean        5.476348e-03 6.785794e-03
## CI.mean.0.95   1.075933e-02 1.333199e-02
## var            1.511516e-02 2.320769e-02
## std.dev        1.229437e-01 1.523407e-01
## coef.var       2.768028e-01 4.415620e-01
```

Analysed how the ratio of the covered food varies over each day of the week.

First looked at the distribution of the total number of consumptions and the total food over the day of the week. 1 = Sunday; 2 = Monday; 3 = Tuesday; 4 = Wednesday; 5 = Thursday; 6 = Friday; 7 = Saturday

```
library(sm)

library(boot)
par(mfrow=c(1,1))

nonGUIConsumptions$dowFactored <- factor(nonGUIConsumptions$DOW)

with(nonGUIConsumptions,
  list(
    ct=boxplot(day_ct~DOW, xlab="Day of the Week", ylab="Number of consumptions",
      main="Number of consumptions by day of the week - Count"),
    weight=boxplot(day_fwt~DOW, xlab="Day of the Week", ylab="Weight of consumptions",
      main="Weight of consumptions by day of the week - Weight")
```

Then explored the actual ratio.

```

with(nonGUIConsumptions,
  list(
    ct=boxplot(ratio_ct*100~DOW, xlab="Day of the Week", ylab="% of non-GUI Consumption (count)",
      main="% Uncovered foods by day of the week - Count"),
    weight=boxplot(ratio_fwt*100~DOW, xlab="Day of the Week", ylab="% of non-GUI Consumption (weight)",
      main="% Uncovered foods by day of the week - Weight")
  )
)

```

```

reportedStats <- as.data.frame(aggregate(cbind(non_gui_ct, day_ct, non_gui_fwt, day_fwt, ratio_ct, ratio_fwt)~DOW, data=nonGUIConsumptions, function(x){
  rst <- pasteecs::stat.desc(x)
  c(rst['nbr.val'], rst['min'], rst['max'], rst['range'], rst['median'], rst['mean'], rst['std.dev'])
} ))

kable(t(reportedStats[, -1 ]), col.names = reportedStats[, 1 ], digits = 1, description="descriptive for key variable")

```

|                     | 1      | 2      | 3      | 4      | 5     | 6      | 7      |
|---------------------|--------|--------|--------|--------|-------|--------|--------|
| non_gui_ct.nbr.val  | 88.0   | 63.0   | 58.0   | 64.0   | 63.0  | 68.0   | 100.0  |
| non_gui_ct.min      | 2.0    | 2.0    | 2.0    | 3.0    | 1.0   | 2.0    | 3.0    |
| non_gui_ct.max      | 18.0   | 19.0   | 16.0   | 16.0   | 19.0  | 18.0   | 21.0   |
| non_gui_ct.range    | 16.0   | 17.0   | 14.0   | 13.0   | 18.0  | 16.0   | 18.0   |
| non_gui_ct.median   | 8.0    | 8.0    | 8.0    | 8.0    | 9.0   | 8.0    | 7.0    |
| non_gui_ct.mean     | 7.7    | 8.0    | 7.8    | 8.3    | 8.8   | 8.0    | 7.9    |
| non_gui_ct.std.dev  | 2.8    | 3.2    | 2.8    | 3.0    | 3.6   | 2.8    | 2.9    |
| day_ct.nbr.val      | 88.0   | 63.0   | 58.0   | 64.0   | 63.0  | 68.0   | 100.0  |
| day_ct.min          | 2.0    | 3.0    | 7.0    | 10.0   | 7.0   | 7.0    | 8.0    |
| day_ct.max          | 31.0   | 28.0   | 29.0   | 35.0   | 35.0  | 32.0   | 35.0   |
| day_ct.range        | 29.0   | 25.0   | 22.0   | 25.0   | 28.0  | 25.0   | 27.0   |
| day_ct.median       | 18.0   | 18.0   | 18.0   | 19.0   | 19.0  | 17.0   | 18.0   |
| day_ct.mean         | 17.3   | 18.0   | 18.5   | 19.4   | 19.6  | 17.9   | 17.9   |
| day_ct.std.dev      | 4.8    | 4.7    | 4.3    | 5.4    | 6.2   | 4.7    | 4.7    |
| non_gui_fwt.nbr.val | 88.0   | 63.0   | 58.0   | 64.0   | 63.0  | 68.0   | 100.0  |
| non_gui_fwt.min     | 76.0   | 78.0   | 71.0   | 138.0  | 100.0 | 96.0   | 83.0   |
| non_gui_fwt.max     | 1144.0 | 1307.0 | 1016.0 | 1154.0 | 980.0 | 1240.0 | 1291.0 |
| non_gui_fwt.range   | 1068.0 | 1229.0 | 945.0  | 1016.0 | 880.0 | 1144.0 | 1208.0 |
| non_gui_fwt.median  | 351.0  | 445.0  | 393.5  | 411.5  | 406.0 | 393.0  | 360.0  |

|                     |        |        |        |        |        |        |        |
|---------------------|--------|--------|--------|--------|--------|--------|--------|
| non_gui_fwt.mean    | 383.9  | 436.9  | 422.4  | 453.8  | 419.7  | 414.4  | 393.9  |
| non_gui_fwt.std.dev | 203.0  | 224.7  | 199.2  | 208.6  | 167.9  | 206.9  | 200.4  |
| day_fwt.nbr.val     | 88.0   | 63.0   | 58.0   | 64.0   | 63.0   | 68.0   | 100.0  |
| day_fwt.min         | 76.0   | 338.0  | 310.0  | 583.0  | 593.0  | 443.0  | 575.0  |
| day_fwt.max         | 2452.0 | 2238.0 | 2260.0 | 2466.0 | 2329.0 | 1993.0 | 2224.0 |
| day_fwt.range       | 2376.0 | 1900.0 | 1950.0 | 1883.0 | 1736.0 | 1550.0 | 1649.0 |
| day_fwt.median      | 1127.0 | 1258.0 | 1259.5 | 1339.5 | 1222.0 | 1142.0 | 1182.0 |
| day_fwt.mean        | 1147.9 | 1263.6 | 1331.8 | 1351.3 | 1249.1 | 1178.8 | 1193.6 |
| day_fwt.std.dev     | 372.0  | 345.3  | 380.0  | 389.5  | 372.1  | 330.8  | 358.0  |
| ratio_ct.nbr.val    | 88.0   | 63.0   | 58.0   | 64.0   | 63.0   | 68.0   | 100.0  |
| ratio_ct.min        | 0.2    | 0.2    | 0.1    | 0.2    | 0.1    | 0.1    | 0.2    |
| ratio_ct.max        | 1.0    | 0.7    | 0.8    | 0.8    | 0.7    | 0.8    | 0.8    |
| ratio_ct.range      | 0.8    | 0.5    | 0.6    | 0.6    | 0.6    | 0.6    | 0.6    |
| ratio_ct.median     | 0.4    | 0.4    | 0.4    | 0.4    | 0.5    | 0.5    | 0.4    |
| ratio_ct.mean       | 0.5    | 0.4    | 0.4    | 0.4    | 0.5    | 0.4    | 0.4    |
| ratio_ct.std.dev    | 0.1    | 0.1    | 0.1    | 0.1    | 0.1    | 0.1    | 0.1    |
| ratio_fwt.nbr.val   | 88.0   | 63.0   | 58.0   | 64.0   | 63.0   | 68.0   | 100.0  |
| ratio_fwt.min       | 0.1    | 0.1    | 0.0    | 0.1    | 0.1    | 0.1    | 0.1    |
| ratio_fwt.max       | 1.0    | 0.8    | 0.7    | 0.7    | 0.8    | 0.7    | 1.0    |
| ratio_fwt.range     | 0.9    | 0.7    | 0.7    | 0.6    | 0.7    | 0.6    | 0.9    |
| ratio_fwt.median    | 0.3    | 0.3    | 0.3    | 0.3    | 0.3    | 0.4    | 0.3    |
| ratio_fwt.mean      | 0.3    | 0.3    | 0.3    | 0.3    | 0.4    | 0.4    | 0.3    |
| ratio_fwt.std.dev   | 0.2    | 0.2    | 0.1    | 0.1    | 0.1    | 0.1    | 0.2    |

A nonparametric density estimation was used and the distribution of the 4 variables investigated: 1. day\_ct total count of consumptions 2. day\_fwt total weight of food in a day 3. ratio\_ct the ratio of the number of consumptions that are covered by GUI 4. ratio\_fwt the ratio of the food weight of the consumptions that are covered by GUI

```
colfill <- c(2:(1+length(nonGUIConsumptions$dowFactored)))

sm.density.compare(nonGUIConsumptions$day_ct, nonGUIConsumptions$dowFactored, xlab="food count" )
title("Distribution of food count by Day of the Week")
legend("topright", levels(nonGUIConsumptions$dowFactored) , fill=colfill)
```

```
sm.density.compare(nonGUIConsumptions$day_fwt, nonGUIConsumptions$dowFactored, xlab="food weight" )
title("Distribution of food weight by Day of the Week")
legend("topright", levels(nonGUIConsumptions$dowFactored) , fill=colfill)
```



```
sm.density.compare(nonGUIConsumptions$ratio_ct, nonGUIConsumptions$dowFactored, xlab="Ratio of non GUI food count" )
title("Distribution of ratio of non GUI food count by Day of the Week")
legend("topright", levels(nonGUIConsumptions$dowFactored) , fill=colfill)
```

```
sm.density.compare(nonGUIConsumptions$ratio_fwt, nonGUIConsumptions$dowFactored, xlab="Ratio of non GUI food weight")
title("Distribution of ratio of non GUI food weight by Day of the Week")
legend("topright", levels(nonGUIConsumptions$dowFactored) , fill=colfill)
```

- Test for ratio of count

```
plot(nonGUIConsumptions$DOW, nonGUIConsumptions$ratio_ct)
```

```
print("==== RATIO CT === ")
## [1] "==== RATIO CT === "

ratioCtCoeff <- sapply(DOW, function(x, nonGUIConsumptions){
  xInclude <- nonGUIConsumptions[nonGUIConsumptions$DOW == x, 'ratio_ct']
  xExclude <- nonGUIConsumptions[nonGUIConsumptions$DOW != x, 'ratio_ct' ]

  xInclude<- sample(xInclude, 5000, replace = TRUE)
  xExclude<- sample(xExclude, 5000, replace = TRUE)
  print(sprintf("Permutation test = %s", x))
  print(wilcox.test(xInclude, xExclude))
}, nonGUIConsumptions)

## [1] "Permutation test = SUN"
##
## Wilcoxon rank sum test with continuity correction
##
## data: xInclude and xExclude
## W = 12866000, p-value = 0.01113
## alternative hypothesis: true location shift is not equal to 0
##
## [1] "Permutation test = MON"
##
## Wilcoxon rank sum test with continuity correction
##
## data: xInclude and xExclude
```

```

## W = 12470000, p-value = 0.8348
## alternative hypothesis: true location shift is not equal to 0
##
## [1] "Permutation test = TUE"
##
## Wilcoxon rank sum test with continuity correction
##
## data: xInclude and xExclude
## W = 10924000, p-value < 2.2e-16
## alternative hypothesis: true location shift is not equal to 0
##
## [1] "Permutation test = WED"
##
## Wilcoxon rank sum test with continuity correction
##
## data: xInclude and xExclude
## W = 11747000, p-value = 1.773e-07
## alternative hypothesis: true location shift is not equal to 0
##
## [1] "Permutation test = THU"
##
## Wilcoxon rank sum test with continuity correction
##
## data: xInclude and xExclude
## W = 13373000, p-value = 1.407e-09
## alternative hypothesis: true location shift is not equal to 0
##
## [1] "Permutation test = FRI"
##
## Wilcoxon rank sum test with continuity correction
##
## data: xInclude and xExclude
## W = 12913000, p-value = 0.00421
## alternative hypothesis: true location shift is not equal to 0
##
## [1] "Permutation test = SAT"
##
## Wilcoxon rank sum test with continuity correction
##
## data: xInclude and xExclude
## W = 12154000, p-value = 0.01647
## alternative hypothesis: true location shift is not equal to 0

print("=== DAY CT === ")

## [1] "=== DAY CT === "

ratioCtCoeff <- sapply(DOW, function(x, nonGUIConsumptions){
  xInclude <- nonGUIConsumptions[nonGUIConsumptions$DOW == x, 'day_ct
']

```

```

xExclude <- nonGUIConsumptions[nonGUIConsumptions$DOW != x, 'day_ct
'
]

xInclude<- sample(xInclude, 5000, replace = TRUE)
xExclude<- sample(xExclude, 5000, replace = TRUE)
print(sprintf("Permutation test = %s", x))
print(wilcox.test(xInclude, xExclude))
}, nonGUIConsumptions)

## [1] "Permutation test = SUN"
##
## Wilcoxon rank sum test with continuity correction
##
## data: xInclude and xExclude
## W = 11038000, p-value < 2.2e-16
## alternative hypothesis: true location shift is not equal to 0
##
## [1] "Permutation test = MON"
##
## Wilcoxon rank sum test with continuity correction
##
## data: xInclude and xExclude
## W = 12590000, p-value = 0.5321
## alternative hypothesis: true location shift is not equal to 0
##
## [1] "Permutation test = TUE"
##
## Wilcoxon rank sum test with continuity correction
##
## data: xInclude and xExclude
## W = 13272000, p-value = 7.967e-08
## alternative hypothesis: true location shift is not equal to 0
##
## [1] "Permutation test = WED"
##
## Wilcoxon rank sum test with continuity correction
##
## data: xInclude and xExclude
## W = 14072000, p-value < 2.2e-16
## alternative hypothesis: true location shift is not equal to 0
##
## [1] "Permutation test = THU"
##
## Wilcoxon rank sum test with continuity correction
##
## data: xInclude and xExclude
## W = 14092000, p-value < 2.2e-16
## alternative hypothesis: true location shift is not equal to 0
##

```

```
## [1] "Permutation test = FRI"
##
## Wilcoxon rank sum test with continuity correction
##
## data: xInclude and xExclude
## W = 11774000, p-value = 4.618e-07
## alternative hypothesis: true location shift is not equal to 0
##
## [1] "Permutation test = SAT"
##
## Wilcoxon rank sum test with continuity correction
##
## data: xInclude and xExclude
## W = 11614000, p-value = 7.766e-10
## alternative hypothesis: true location shift is not equal to 0
```

### Test for ratio of food weight

```
print("==== RATIO FWT====")
## [1] "==== RATIO FWT===="
ratioCtCoeff <- sapply(DOW, function(x, nonGUIConsumptions){
  xInclude <- nonGUIConsumptions[nonGUIConsumptions$DOW == x, 'ratio_
fwt']
  xExclude <- nonGUIConsumptions[nonGUIConsumptions$DOW != x, 'ratio_
fwt' ]

  xInclude<- sample(xInclude, 5000, replace = TRUE)
  xExclude<- sample(xExclude, 5000, replace = TRUE)

  print(sprintf("Permutation test = %s", x))
  print(wilcox.test(xInclude, xExclude))
}, nonGUIConsumptions)
## [1] "Permutation test = SUN"
##
## Wilcoxon rank sum test with continuity correction
##
## data: xInclude and xExclude
## W = 12506000, p-value = 0.9688
## alternative hypothesis: true location shift is not equal to 0
##
## [1] "Permutation test = MON"
##
## Wilcoxon rank sum test with continuity correction
##
## data: xInclude and xExclude
## W = 12335000, p-value = 0.2539
```

```

## alternative hypothesis: true location shift is not equal to 0
##
## [1] "Permutation test = TUE"
##
## Wilcoxon rank sum test with continuity correction
##
## data: xInclude and xExclude
## W = 11531000, p-value = 1.93e-11
## alternative hypothesis: true location shift is not equal to 0
##
## [1] "Permutation test = WED"
##
## Wilcoxon rank sum test with continuity correction
##
## data: xInclude and xExclude
## W = 12841000, p-value = 0.01831
## alternative hypothesis: true location shift is not equal to 0
##
## [1] "Permutation test = THU"
##
## Wilcoxon rank sum test with continuity correction
##
## data: xInclude and xExclude
## W = 13089000, p-value = 4.479e-05
## alternative hypothesis: true location shift is not equal to 0
##
## [1] "Permutation test = FRI"
##
## Wilcoxon rank sum test with continuity correction
##
## data: xInclude and xExclude
## W = 14019000, p-value < 2.2e-16
## alternative hypothesis: true location shift is not equal to 0
##
## [1] "Permutation test = SAT"
##
## Wilcoxon rank sum test with continuity correction
##
## data: xInclude and xExclude
## W = 12023000, p-value = 0.0009522
## alternative hypothesis: true location shift is not equal to 0

print("=== DAY FWT === ")

## [1] "=== DAY FWT === "

ratioCtCoeff <- sapply(DOW, function(x, nonGUIConsumptions){
  xInclude <- nonGUIConsumptions[nonGUIConsumptions$DOW == x, 'day_fw
t']
  xExclude <- nonGUIConsumptions[nonGUIConsumptions$DOW != x, 'day_fw

```

```

t' ]

xInclude<- sample(xInclude, 5000, replace = TRUE)
xExclude<- sample(xExclude, 5000, replace = TRUE)

print(sprintf("Permutation test = %s", x))
print(wilcox.test(xInclude, xExclude))
}, nonGUIConsumptions)

## [1] "Permutation test = SUN"
##
## Wilcoxon rank sum test with continuity correction
##
## data: xInclude and xExclude
## W = 10519000, p-value < 2.2e-16
## alternative hypothesis: true location shift is not equal to 0
##
## [1] "Permutation test = MON"
##
## Wilcoxon rank sum test with continuity correction
##
## data: xInclude and xExclude
## W = 13713000, p-value < 2.2e-16
## alternative hypothesis: true location shift is not equal to 0
##
## [1] "Permutation test = TUE"
##
## Wilcoxon rank sum test with continuity correction
##
## data: xInclude and xExclude
## W = 15005000, p-value < 2.2e-16
## alternative hypothesis: true location shift is not equal to 0
##
## [1] "Permutation test = WED"
##
## Wilcoxon rank sum test with continuity correction
##
## data: xInclude and xExclude
## W = 14859000, p-value < 2.2e-16
## alternative hypothesis: true location shift is not equal to 0
##
## [1] "Permutation test = THU"
##
## Wilcoxon rank sum test with continuity correction
##
## data: xInclude and xExclude
## W = 12737000, p-value = 0.1005
## alternative hypothesis: true location shift is not equal to 0
##

```

```
## [1] "Permutation test = FRI"
##
## Wilcoxon rank sum test with continuity correction
##
## data: xInclude and xExclude
## W = 11359000, p-value = 2.707e-15
## alternative hypothesis: true location shift is not equal to 0
##
## [1] "Permutation test = SAT"
##
## Wilcoxon rank sum test with continuity correction
##
## data: xInclude and xExclude
## W = 11247000, p-value < 2.2e-16
## alternative hypothesis: true location shift is not equal to 0
```

- **Daily intake and Snacks**

```
missedFoodAvgDailyIntakeBySubjects <- sqldf("SELECT SUBJECID, IUNA_NPN
S_77FG,
                                CASE WHEN MTYPE IN (6,7,8,11) THEN 'Snack' E
LSE 'Main meal' END meal_type,
                                SUM(CASE WHEN GUI_CODE IS NULL THEN 1 ELSE 0
END)/4.0 non_gui_fq_daily_avg,
                                SUM(CASE WHEN GUI_CODE IS NULL THEN FWT ELSE
0 END)/4.0 non_gui_fwt_daily_avg
                                FROM foodDataGUIMapped
                                GROUP BY SUBJECID, IUNA_NPNS_77FG,
                                CASE WHEN MTYPE IN (6,7,8,11) THEN 'Snack' E
LSE 'Main meal' END
                                ", verbose = TRUE)

missedFoodDailySummary <- as.data.frame( as.matrix(
  aggregate(non_gui_fwt_daily_avg~IUNA_NPNS_77FG+meal_type, data=mis
sedFoodAvgDailyIntakeBySubjects, function(x){c(mean(x), sd(x), quant
ile(x,0.50), IQR(x))})
))
colnames(missedFoodDailySummary) <- c('IUNA_NPNS_77FG', 'meal_type', '
avg_di', 'sd_di', 'p50_di', 'iqr_di')

exportSummary <-
merge(
missedFoodDailySummary[missedFoodDailySummary$meal_type == 'Snack', c
(1,3,4,5,6)],
missedFoodDailySummary[missedFoodDailySummary$meal_type != 'Snack', c
(1,3,4,5,6)],
by= "IUNA_NPNS_77FG",
```

```

suffixes = c("_snack", "_main_meal"),
all=TRUE
)

```

```

kable(exportSummary, caption = "Summary stats using daily intake")

```

*stats using daily intake*

- **Consumption averages**

```

missedFoodMeanIntakeBySubjects <- sqldf("SELECT SUBJECID, SURVDAY, IUNA_
_NPNS_77FG,
                                CASE WHEN MTYPE IN (6,7,8,11) THEN 'Snack' E
LSE 'Main meal' END meal_type,
                                SUM(CASE WHEN GUI_CODE IS NULL THEN 1 ELSE 0
END) non_gui_fq_daily_avg,
                                AVG(CASE WHEN GUI_CODE IS NULL THEN FWT ELSE
0 END) non_gui_fwt_daily_avg
FROM foodDataGUIMapped
GROUP BY SUBJECID, IUNA_NPNS_77FG, SURVDAY,
CASE WHEN MTYPE IN (6,7,8,11) THEN 'Snack' E
LSE 'Main meal' END
")

```

```

missedFoodMeanSummary <- as.data.frame( as.matrix(
  aggregate(non_gui_fwt_daily_avg~IUNA_NPNS_77FG+meal_type, data=miss
edFoodMeanIntakeBySubjects, function(x){c(mean(x), sd(x), quantile(
x,0.50), IQR(x))})
))
colnames(missedFoodDailySummary) <- c('IUNA_NPNS_77FG', 'meal_type', '
avg_di', 'sd_di', 'p50_di', 'iqr_di')

```

```

exportMeanSummary <-
  merge(
    missedFoodMeanSummary[missedFoodMeanSummary$meal_type == 'Snack',
c(1,3,4,5,6)],
    missedFoodMeanSummary[missedFoodMeanSummary$meal_type != 'Snack',
c(1,3,4,5,6)],
    by= "IUNA_NPNS_77FG",
    suffixes = c("_snack", "_main_meal"),
    all=TRUE
  )

```

```

kable(exportMeanSummary, caption = "Summary stats using consumption aver
ages")

```
